# Supplementary material for: Seasonal changes of commercial traits, proximate and fatty acid compositions of the scallop Flexopecten glaber from the Mediterranean Sea (Southern Italy)
Source: PeerJ. 2019 Jan 21;7:e5810. doi: 10.7717/peerj.5810 (PMC6345216; doi:10.7717/peerj.5810)
Supplement: Data S1 [file peerj-07-5810-s001.xlsx]

## Sheet: FAS
SEPTEMBER					OCTOBER					NOVEMBER					DECEMBER					JANUARY					FEBRUARY					MARCH					APRIL					MAY					JUNE
FAs mg/100g e.p.	R1	R2	R3		FAs mg/100g e.p.	R1	R2	R3		FAs mg/100g e.p.	R1	R2	R3		FAs mg/100g e.p.	R1	R2	R3		FAs mg/100g e.p.	R1	R2	R3		FAs mg/100g e.p.	R1	R2	R3		FAs mg/100g e.p.	R1	R2	R3		FAs mg/100g e.p.	R1	R2	R3		FAs mg/100g e.p.	R1	R2	R3		FAs mg/100g e.p.	R1	R2	R3
C12:0	7.28445	4.90274	6.09359		C12:0	10.2882	11.9711	11.1297		C12:0	7.88921	12.5595	10.2244		C12:0	5.55673	5.44505	5.50089		C12:0	4.45393	7.34038	5.89716		C12:0	6.21478	6.72328	6.46903		C12:0	2.9509	2.57511	2.763		C12:0	2.92961	3.88114	3.40538		C12:0	2.70183	3.21631	2.95907		C12:0	2.71894	3.31582	3.01738
C14:0	13.2391	7.73816	10.4886		C14:0	58.4839	56.9433	57.7136		C14:0	65.7708	94.6289	80.1999		C14:0	14.6842	21.5479	18.116		C14:0	41.1466	56.0364	48.5915		C14:0	39.8864	53.3296	46.608		C14:0	24.9121	35.8542	30.3832		C14:0	32.2942	45.2555	38.7749		C14:0	53.2863	56.073	54.6797		C14:0	44.6424	73.9065	59.2745
C15:0					C15:0	0.11603	0.290642	0.203336		C15:0					C15:0					C15:0					C15:0					C15:0	0	0	0		C15:0					C15:0					C15:0	0.388606	0.503203	0.445905
C16:0	305.324	273.315	289.32		C16:0	158.001	165.149	161.575		C16:0	208.042	210.828	209.435		C16:0	155.188	191.606	173.397		C16:0	180.132	182.082	181.107		C16:0	165.961	174.891	170.426		C16:0	157.07	170.809	163.939		C16:0	204.534	205.026	204.78		C16:0	207.925	220.409	214.167		C16:0	203.342	210.173	206.758
C17:0	25.2439	23.8191	24.5315		C17:0	7.76028	6.66648	7.21338		C17:0	9.91599	9.36758	9.64179		C17:0	8.50095	10.7238	9.61239		C17:0	8.08113	7.95227	8.0167		C17:0	9.38478	9.21651	9.30064		C17:0	9.95815	8.11755	9.03785		C17:0	11.9939	12.2719	12.1329		C17:0	13.2614	14.0739	13.6676		C17:0	15.6829	10.8639	13.2734
C18:0	100.377	88.9944	94.6856		C18:0	25.9791	25.7763	25.8777		C18:0	43.7335	32.2706	38.0021		C18:0	39.912	40.2083	40.0602		C18:0	28.4291	29.8787	29.1539		C18:0	46.988	36.9346	41.9613		C18:0	37.5816	30.8485	34.2151		C18:0	41.2757	39.2882	40.2819		C18:0	47.3432	42.6877	45.0155		C18:0	52.7467	32.9772	42.8619
C20:0					C20:0	0.815291	0.65888	0.737086		C20:0	0.961549	0.289969	0.625759		C20:0					C20:0					C20:0					C20:0	0	0	0		C20:0					C20:0					C20:0	0	0	0
C21:0	2.48774	3.29877	2.89325		C21:0	1.06591	0.880545	0.973229		C21:0	0.882261	0.497681	0.689971		C21:0	2.39926	2.13952	2.26939		C21:0	1.34324	1.19731	1.27028		C21:0	1.11789	0.529893	0.823893		C21:0	1.66082	1.29262	1.47672		C21:0	2.28148	2.28282	2.28215		C21:0	4.40826	3.73614	4.0722		C21:0	3.36349	3.2771	3.32029
∑SAFA	453.956	402.068	428.012	428.012	∑SAFA	262.51	268.336	265.423	265.423	∑SAFA	337.195	360.443	348.819	348.819	∑SAFA	226.241	271.671	248.956	248.956	∑SAFA	263.586	284.487	274.037	274.037	∑SAFA	269.553	281.625	275.589	275.589	∑SAFA	234.133	249.497	241.815	241.815	∑SAFA	295.309	308.006	301.657	301.657	∑SAFA	328.926	340.196	334.561		∑SAFA	322.885	335.017	328.951
																															0	0	0													0	0	0
C14:1	5.80835	5.71017	5.75926		C14:1	1.74563	2.71572	2.23067		C14:1	1.19537	0.529527	0.862447		C14:1	0.557821	0.913406	0.735613		C14:1	1.52898	1.52631	1.52764		C14:1	1.06627	0.53707	0.80167		C14:1	1.05999	1.26396	1.16198		C14:1	1.26879	1.53591	1.40235		C14:1					C14:1	0	0	0
C15:1	1.62766	4.32522	2.97644		C15:1					C15:1					C15:1	4.95357	2.13205	3.54281		C15:1					C15:1					C15:1	0	0	0		C15:1					C15:1					C15:1	0	0	0
C16:1	51.538	45.2282	48.3831		C16:1	115.464	107.98	111.722		C16:1	73.5337	67.7025	70.6181		C16:1	51.0232	69.832	60.4276		C16:1	75.1756	71.1161	73.1458		C16:1	42.7442	49.8978	46.321		C16:1	42.5229	49.912	46.2174		C16:1	69.1599	67.4947	68.3273		C16:1	66.6881	69.6785	68.1833		C16:1	56.7825	71.8514	64.3169
C17:1	8.20072	8.23595	8.21833		C17:1	4.88325	3.81674	4.35		C17:1	4.37881	3.6634	4.02111		C17:1	4.62944	6.12737	5.3784		C17:1	6.1449	5.54669	5.84579		C17:1	4.4356	4.96412	4.69986		C17:1	4.87652	5.20542	5.04097		C17:1	6.98687	7.07036	7.02862		C17:1	6.54835	7.40746	6.97791		C17:1	7.53811	6.97252	7.25531
C18:1n7	6.18358	3.64945	4.91651		C18:1n7	7.24859	14.8403	11.0444		C18:1n7	18.5822	31.184	24.8831		C18:1n7	19.173	18.8439	19.0085		C18:1n7	16.6571	15.8543	16.2557		C18:1n7	13.7633	15.3159	14.5396		C18:1n7	11.9626	13.3394	12.651		C18:1n7	4.35573	18.0046	11.1802		C18:1n7	11.4722	10.4666	10.9694		C18:1n7	3.35787	14.866	9.11193
C18:1n9t					C18:1n9t					C18:1n9t					C18:1n9t					C18:1n9t					C18:1n9t	6.01221	3.36126	4.68674		C18:1n9t	2.94552	3.35052	3.14802		C18:1n9t	4.09759	3.86875	3.98317		C18:1n9t	6.24191	5.64825	5.94508		C18:1n9t	0	0	0
C18:1n9c	111.654	89.4903	100.572		C18:1n9c	43.22	29.2651	36.2425		C18:1n9c	43.4952	32.2637	37.8794		C18:1n9c	45.8889	55.2954	50.5922		C18:1n9c	44.1239	41.88	43.002		C18:1n9c	45.1423	42.3789	43.7606		C18:1n9c	38.5065	42.4341	40.4703		C18:1n9c	66.7318	45.8145	56.2732		C18:1n9c	64.2543	63.2141	63.7342		C18:1n9c	65.4521	56.2022	60.8272
C20:1n9	4.21462	2.17331	3.19397		C20:1n9	0.790056	0.695138	0.742597		C20:1n9	3.54385	3.24906	3.39645		C20:1n9					C20:1n9					C20:1n9					C20:1n9	0.141202	0.550702	0.345952		C20:1n9	2.81278	2.73173	2.77225		C20:1n9	3.04589	2.93395	2.98992		C20:1n9	2.40331	1.13806	1.77068
C22:1n9	1.43703	1.95757	1.6973		C22:1n9	1.64124	2.10003	1.87063		C22:1n9	0.578658	0.673942	0.6263		C22:1n9	5.05104	2.09747	3.57426		C22:1n9	1.61776	1.33397	1.47587		C22:1n9	3.03408	1.60751	2.32079		C22:1n9	2.15953	1.77484	1.96718		C22:1n9					C22:1n9	1.27992	1.18633	1.23313		C22:1n9	3.94063	2.94012	3.44038
∑MUFA	190.664	160.77	175.717		∑MUFA	174.993	161.413	168.203		∑MUFA	145.308	139.266	142.287		∑MUFA	131.277	155.242	143.259		∑MUFA	145.248	137.257	141.253		∑MUFA	116.198	118.062	117.13		∑MUFA	104.175	117.831	111.003		∑MUFA	155.413	146.521	150.967		∑MUFA	159.531	160.535	160.033		∑MUFA	139.474	153.97	146.722
																															0	0	0													0	0	0
C18:2n6t					C18:2n6t	0.74553	1.49904	1.12228		C18:2n6t	1.82884	3.65738	2.74311		C18:2n6t					C18:2n6t					C18:2n6t					C18:2n6t	0	0	0		C18:2n6t					C18:2n6t					C18:2n6t	0	0	0
C18:2n6c	21.7002	24.1893	22.9447		C18:2n6c	11.3847	12.4019	11.8933		C18:2n6c	10.3282	7.13172	8.72993		C18:2n6c	16.6502	17.6666	17.1584		C18:2n6c	16.1535	15.253	15.7032		C18:2n6c	16.2222	15.4011	15.8116		C18:2n6c	14.894	16.084	15.489		C18:2n6c	24.6161	23.2756	23.9459		C18:2n6c	25.7366	24.4727	25.1046		C18:2n6c	24.9046	26.391	25.6478
C18:3n6	2.51059	3.01067	2.76063		C18:3n6	2.70998	3.02255	2.86627		C18:3n6	1.06044	0.325719	0.693079		C18:3n6	3.74012	3.04047	3.39029		C18:3n6	2.18089	1.99051	2.0857		C18:3n6	1.87513	1.88647	1.8808		C18:3n6	1.5553	1.46372	1.50951		C18:3n6	2.53057	2.91292	2.72174		C18:3n6	2.06119	2.97905	2.52012		C18:3n6	2.48557	3.25387	2.86972
C18:3n3	19.9079	30.3415	25.1247		C18:3n3	10.2364	9.78193	10.0092		C18:3n3	8.96932	6.57674	7.77303		C18:3n3	22.0853	21.2343	21.6598		C18:3n3	18.9787	17.6101	18.2944		C18:3n3	17.9499	17.9489	17.9494		C18:3n3	17.8062	17.7904	17.7983		C18:3n3	29.3126	27.1101	28.2113		C18:3n3	29.1119	27.7899	28.4509		C18:3n3	27.1607	22.4089	24.7848
C18:4n3	14.0602	21.1644	17.6123		C18:4n3	16.831	15.4658	16.1484		C18:4n3	6.81627	3.36785	5.09206		C18:4n3	34.1756	39.8777	37.0267		C18:4n3	43.6478	40.1667	41.9072		C18:4n3	38.176	40.7146	39.4453		C18:4n3	43.4781	27.0371	35.2576		C18:4n3	62.2411	63.0285	62.6348		C18:4n3	54.1297	50.8191	52.4744		C18:4n3	45.8712	42.2486	44.0599
C20:2	1.14598	1.78334	1.46466		C20:2	0.474442	0.366082	0.420262		C20:2	0.804132	0.230132	0.517132		C20:2	5.58757	1.76812	3.67785		C20:2					C20:2					C20:2	0	0	0		C20:2					C20:2					C20:2	0	0	0
C22:0 + 20:3n6	0.997588	2.07764	1.53761		C22:0 + 20:3n6	1.43362	1.44962	1.44162		C22:0 + 20:3n6	0.256709	0.664249	0.460479		C22:0 + 20:3n6	11.0747	1.88673	6.48074		C22:0 + 20:3n6	0.885994	0.892782	0.889388		C22:0 + 20:3n6	0.473157	0.637797	0.555477		C22:0 + 20:3n6	0.828991	0.593507	0.711249		C22:0 + 20:3n6	1.50039	1.14396	1.32218		C22:0 + 20:3n6	2.69832	1.68091	2.18962		C22:0 + 20:3n6	1.99778	1.88082	1.9393
C20:3n3 + 22:1	1.90575	0.793701	1.34973		C20:3n3 + 22:1	0.361092	0.367232	0.364162		C20:3n3 + 22:1					C20:3n3 + 22:1	12.3523	3.42987	7.89109		C20:3n3 + 22:1					C20:3n3 + 22:1	0.607222	0.588053	0.597637		C20:3n3 + 22:1	0	0	0		C20:3n3 + 22:1	0.935175	0.87197	0.903572		C20:3n3 + 22:1	2.06071	1.40157	1.73114		C20:3n3 + 22:1	1.87234	2.00757	1.93996
C20:4n6	24.5618	29.6437	27.1027		C20:4n6	16.4254	17.491	16.9582		C20:4n6	10.2504	8.06019	9.15529		C20:4n6	33.7363	20.2137	26.975		C20:4n6	14.613	14.0596	14.3363		C20:4n6	16.4489	15.2144	15.8317		C20:4n6	12.6592	12.1426	12.4009		C20:4n6	18.1394	17.5602	17.8498		C20:4n6	17.0927	17.629	17.3609		C20:4n6	19.2445	17.1219	18.1832
C22:2	0.992741	1.44292	1.21783		C22:2	0.451271	0.643256	0.547264		C22:2	1.29749	2.37858	1.83803		C22:2					C22:2					C22:2					C22:2	0	0	0		C22:2					C22:2					C22:2	0	0	0
C20:5n3	48.2734	67.4989	57.8862		C20:5n3	65.3074	70.1066	67.707		C20:5n3	29.1145	23.3633	26.2389		C20:5n3	107.572	81.1495	94.3606		C20:5n3	66.208	62.3692	64.2886		C20:5n3	56.772	53.2249	54.9985		C20:5n3	56.347	52.1432	54.2451		C20:5n3	74.9626	73.7179	74.3403		C20:5n3	80.3186	77.3234	78.821		C20:5n3	64.5539	57.1543	60.8541
C22:5n3	1.7996	3.86235	2.83097		C22:5n3	3.08833	1.00662	2.04747		C22:5n3					C22:5n3	4.17568	1.72435	2.95001		C22:5n3	1.25686	1.14067	1.19876		C22:5n3	2.97833	1.4038	2.19106		C22:5n3	2.38083	2.09355	2.23719		C22:5n3					C22:5n3					C22:5n3	0	0	0
C22:6n3	64.5208	98.2524	81.3866		C22:6n3	35.0473	38.649	36.8482		C22:6n3	20.7711	18.5352	19.6531		C22:6n3	77.3326	67.0963	72.2144		C22:6n3	43.2413	40.7727	42.007		C22:6n3	50.7462	41.2947	46.0204		C22:6n3	57.7426	49.3264	53.5345		C22:6n3	70.0393	70.8527	70.446		C22:6n3	90.8536	93.173	92.0133		C22:6n3	98.5511	87.5479	93.0495
∑ PUFA	202.377	284.061	243.219		∑ PUFA	164.497	172.251	168.374		∑ PUFA	91.4972	74.2911	82.8942		∑ PUFA	328.482	259.088	293.785		∑ PUFA	207.166	194.255	200.711		∑ PUFA	202.249	188.315	195.282		∑ PUFA	207.692	178.674	193.183		∑ PUFA	284.277	280.474	282.376		∑ PUFA	304.063	297.269	300.666		∑ PUFA	286.642	260.015	273.328
[truncated: 8 more columns]

## Sheet: Proximate
PROTEIN	Sep	Oct	Nov	Dec	Jan	Feb	Mar	Apr	May	Jun	July	Aug
R1	10.14	8.21	8.93	10.93	10.31	9.91	8.37	10.19	9.81	10.22	10.73	10.44
R2	11.25	8.78	9.88	11.86	11.38	10.05	8.61	11.17	12.3	12.98	13.73	13.25
R3	12.48	9.98	10.5	9.34	9.09	8.21	7.56	10.56	10.32	11.51	11.51	11.35
mean	11.29	8.99	9.77	10.71	10.26	9.39	8.18	10.64	10.81	11.57	11.99	11.68
sd	0.95572	0.737699	0.645652	1.04048	0.935557	0.836341	0.449222	0.404063	1.07396	1.12756	1.27091	1.17067
LIPID	Sep	Oct	Nov	Dec	Jan	Feb	Mar	Apr	May	Jun	July	Aug
R1	1.07	1	0.92	0.92	1	0.91	0.88	0.92	1.06	0.98	1.11	1.14
R2	1.25	0.85	0.85	1.14	0.87	0.85	0.77	1.2	1.25	1.2	1.26	1.31
R3	1.31	0.73	0.69	0.88	0.77	0.76	0.69	1.03	1.11	1.03	1.11	1.09
mean	1.21	0.86	0.82	0.98	0.88	0.84	0.78	1.05	1.14	1.07	1.16	1.18
sd	0.10198	0.110454	0.0962635	0.11431	0.094163	0.0616441	0.0778888	0.115181	0.0804156	0.094163	0.0707107	0.094163
	Sep	Oct	Nov	Dec	Jan	Feb	Mar	Apr	May	Jun	July	Aug
CARBOHYDRATES	1.27	3.51	2.42	2.42	2.75	2.81	3.03	2.24	1.89	1.5	1.14	1.25
R1	1.14	3.24	2.63	2.58	2.48	3.25	2.73	2.14	1.75	1.73	1.11	1.23
R2	1.31	3.15	2.36	2.38	2.63	3.13	2.91	2.37	1.7	1.72	1.32	1.33
R3	1.24	3.3	2.47	2.46	2.62	3.06333	2.89	2.25	1.78	1.65	1.19	1.27
mean	0.0725718	0.152971	0.115758	0.0864099	0.110454	0.185712	0.123288	0.094163	0.0804156	0.106145	0.0927362	0.0432049
sd
	Sep	Oct	Nov	Dec	Jan	Feb	Mar	Apr	May	Jun	July	Aug
Ash	2.42	2.77	2.88	2.39	2.84	2.88	2.12	2.42	2.32	2.43	3.08	2.79
R1	2.62	2.62	2.76	2.62	2.51	2.5	2.38	2.66	2.53	2.59	2.83	2.68
R2	2.31	2.56	2.58	2.52	2.57	2.66	2.31	2.51	2.5	2.24	2.7	2.54
R3	2.45	2.65	2.74	2.51	2.64	2.68	2.27	2.53	2.45	2.42	2.87	2.67
mean	0.128323	0.0883176	0.123288	0.094163	0.143527	0.155778	0.109848	0.0989949	0.0927362	0.143062	0.157692	0.102307
sd
Moisture	Sep	Oct	Nov	Dec	Jan	Feb	Mar	Apr	May	Jun	July	Aug
R1	83.73	83.72	83.79	82.77	82.64	82.38	83.1	82.98	80.97	82.59	83.11	80.85
R2	81.48	81.43	82.56	81.71	83.51	82.95	86.2	82.82	82.93	80.48	80.9	82.88
R3	82.8	82.54	83.34	83.11	81.38	81.09	85.13	82.15	83.34	83.77	82.5	83.38
mean	82.67	82.5633	83.23	82.53	82.51	82.14	84.81	82.65	82.4133	82.28	82.17	82.37
sd	1.13062	1.14518	0.622334	0.730205	1.07093	0.952943	1.57458	0.440341	1.26666	1.66676	1.14136	1.33989

## Sheet: CONDITION INDEX
C.I.	Sep	Oct	Nov	Dec	Jan	Feb	Mar	Apr	May	Jun	July	Aug		ANOVA
	36.6667	48.2309	52.9605	57.7396	38.546	57.6246	48.6529	66.7583	43.25	70.9677	46.0481	39.211
	40.68	32.0757	41.1765	57.8591	32.1851	30.4153	51.6718	55.6268	53.24	56.8306	36.4791	44.52			Sum of sqrs	df	Mean square	F	p (same)
	41.9929	35.4207	64.1509	74.8232	29.235	43.7229	63.0979	39.0721	48.75	52.2388	50.3448	44.36		Between groups:	10376.5	11	943.317	8.198	2.072e-11
	44.3476	33.9658	51.0274	52.4302	33.887	64.2748	46.5654	64.5268	48.95	48.4043	46.5228	52.293		Within groups:	19331.4	168	115.068
	33.3333	27.8471	51.6216	69.3679	35.5856	41.4991	40.7925	51.2998	52.82	43.8735	48.1752	39.872		Total:	29707.9	179
	39.5833	35.8375	15.7682	66.1111	57.8778	33.0534	46.6015	87.395	55.64	36.1538	47.2973	37.56
	45.0276	36.9823	18.7311	72.4129	82.2828	72.419	44.9279	73.13	52.39	65.6566	49.734	38.69		omega2:	0.3055
	51.9637	51.2346	58.2228	55.6551	37.9707	44.9168	22.9543	63.93	60.25	65.493	45.0237	40.08
	48.8177	32.3483	25.7405	72.6236	33.8333	54.0441	52.4869	63.85	59.31	55.3435	45.9941	43.45		Levene´s test for homogeneity of variance, from means	p (same):	3.57e-07
	42.8105	39.0334	30.9877	61.8908	49.9166	54.1162	29.2529	57.6524	56.86	56.129	43.7143	43.48		Levene´s test, from medians	p (same):	0.0001249
	43.695	33.9692	34.0163	76.2182	51.8409	56.7424	24.857	45.8988	61.85	53.5249	43.4211	44.16
	52.4242	51.9196	23.3353	46.856	55.9387	50.3531	26.2772	64.5415	54.97	62.2642	55.4656	45.53		Welch F test in the case of unequal variances: F=9,971, df=65,67, p=2,362E-10
	47.4874	36.75	19.4785	53.5757	33.0042	21.0317	39.7933	67.4853	61.22	52.2222	48.2972	46.89
	48.7842	27.7382	18.5785	39.1493	52.7354	41.0175	53.5065	42.7289	60.05	44.2966	39.1709	45.21
	49.2366	42.3321	28.7081	38.0764	47.5753	49.7404	63.1557	61.3738	54.95	37.1648	34.3066	46.82
Mean	44.4567	37.7124	35.6336	59.6526	44.8276	47.6648	43.6396	60.3513	54.9667	53.3709	45.333	43.4751
SD	5.48857	7.62538	16.258	12.3588	14.1347	13.3357	12.9719	12.3388	5.27459	10.2434	5.44164	3.87998
			months / Tukey (HSD) / Confidence of 95%:
			Contrast	Difference	Standardized difference	Critical value	Pr > Diff	Signif.
			Apr vs Nov	24.7132	6.40207	3.16368	< 0,0001	Yes			GSI	CI	MY
			Apr vs Oct	22.63	6.0799	3.16368	< 0,0001	Yes			7.55669	44.4567	30.5264
			Apr vs March	16.6138	4.39043	3.16368	0.000479369	Yes			2.1384	37.7124	19.0625
			Apr vs Sep	15.8901	4.49056	3.16368	0.000303705	Yes			16.7156	35.6336	21.6328
			Apr vs Jan	15.52	4.12538	3.16368	0.00152131	Yes			15.1436	59.6526	36.76
			Apr vs July	15.0218	4.23397	3.16368	0.000956836	Yes			7.37651	44.8276	27.9489
			Apr vs Feb	12.6831	3.26081	3.16368	0.0370686	Yes			6.60948	47.6648	30.6733
			Apr vs Jun	6.97723	1.98629	3.16368	0.60878	No			8.19871	43.6396	24.142
			Apr vs Dec	0.694846	0.192261	3.16368	1	No			13.4396	60.3513	36.4207
			Dec vs Nov	24.0184	8.17522	3.16368	< 0,0001	Yes			12.6167	54.9667	35.6421
			Dec vs Oct	21.9351	7.96487	3.16368	< 0,0001	Yes			6.53185	53.3709	34.3659
			Dec vs March	15.9189	5.61076	3.16368	< 0,0001	Yes			17.1727	45.333	27.6805
			Dec vs Sep	15.1952	6.07723	3.16368	< 0,0001	Yes			16.1747	43.4751	26.7173
			Dec vs Jan	14.8251	5.28003	3.16368	< 0,0001	Yes
			Dec vs July	14.3269	5.69978	3.16368	< 0,0001	Yes
			Dec vs Feb	11.9883	4.02773	3.16368	0.00228225	Yes
			Dec vs Jun	6.28239	2.55005	3.16368	0.24191	No			Correlation	0.190183	0.213443
			Jun vs Nov	17.736	6.3066	3.16368	< 0,0001	Yes
			Jun vs Oct	15.6527	5.97543	3.16368	< 0,0001	Yes
			Jun vs March	9.63655	3.56001	3.16368	0.0136309	Yes
			Jun vs Sep	8.91282	3.79039	3.16368	0.00584071	Yes
			Jun vs Jan	8.54274	3.19234	3.16368	0.0458358	Yes
			Jun vs July	8.04455	3.40078	3.16368	0.0235531	Yes
			Jun vs Feb	5.7059	2.00033	3.16368	0.598786	No
			Feb vs Nov	12.0301	3.67793	3.16368	0.00890575	Yes
			Feb vs Oct	9.94683	3.20174	3.16368	0.0445362	Yes
			Feb vs March	3.93065	1.23577	3.16368	0.966705	No
			Feb vs Sep	3.20692	1.11187	3.16368	0.983663	No
			Feb vs Jan	2.83684	0.899307	3.16368	0.996532	No
			Feb vs July	2.33865	0.807617	3.16368	0.998493	No
			July vs Nov	9.69142	3.39316	3.16368	0.0241575	Yes
			July vs Oct	7.60819	2.85318	3.16368	0.11909	No
			July vs March	1.592	0.578395	3.16368	0.999901	No
			July vs Sep	0.868273	0.36122	3.16368	0.999998	No
			July vs Jan	0.498196	0.18302	3.16368	1	No
			Jan vs Nov	9.19323	2.94826	3.16368	0.0926555	No
			Jan vs Oct	7.10999	2.41384	3.16368	0.317269	No
			Jan vs March	1.0938	0.361771	3.16368	0.999998	No
			Jan vs Sep	0.370077	0.136567	3.16368	1	No
			Sep vs Nov	8.82315	3.10181	3.16368	0.0600926	No
			Sep vs Oct	6.73991	2.53945	3.16368	0.247337	No
			Sep vs March	0.723726	0.2641	3.16368	1	No
			March vs Nov	8.09942	2.57556	3.16368	0.229171	No
			March vs Oct	6.01619	2.02321	3.16368	0.582448	No
			Oct vs Nov	2.08324	0.678614	3.16368	0.999628	No
			Valore critico della d di Tukey:			4.47413
				Mean	Groups
			Apr	60.3484	A
			Dec	59.6535	A
			Jun	53.3711	A	B
			Feb	47.6652		B	C
			July	45.3266			C	D
			Jan	44.8284			C	D	E
			Sep	44.4583			C	D	E
			March	43.7346			C	D	E
			Oct	37.7184				D	E
			Nov	35.6352					E

## Sheet: Meat yield
MY	Sep	Oct	Nov	Dec	Jan	Feb	Mar	Apr	May	Jun	July	Aug			ANOVA
	26.6846	20.3993	16.7012	41.3928	29.2396	36.5581	34.4292	30.1623	32.53	41.1215	30.2326	26.89
	28.3333	22.1814	25.6604	33.9018	21.2544	26.5166	20	38.8735	35.66	35.8621	26.9327	25.78				Sum of sqrs	df	Mean square	F	p (same)
	30.411	21.445	28.5824	40.8556	16.9841	32.899	44.5338	36.8571	50.32	34.34	21.9619	32.96			Between groups:	5654.39	11	514.036	8.879	2.337e-12
	28.2178	11.8012	33.9013	40.7284	18.668	39.1264	19.8924	40.1615	23.59	34.0909	30.6962	26.93			Within groups:	9725.59	168	57.8904
	29.9087	19.1982	33.4684	33.8373	21.7814	30.67	28.4091	36.2864	40.96	32.2695	27.67	26.91			Total:	15380	179
	28.7879	25.031	36.3913	30.0294	36.8636	26.492	28.0641	33.2857	38.38	24.5262	28.7091	24.56
	27.5641	18.5061	38.06	40.6181	41.3112	17.2202	27.52	36.38	36.64	29.2282	32.7456	21.64			omega2:	0.325
	32.7586	19.05	14.3884	36.77	18.2209	74.3119	16.175	34.4841	48.32	39.5275	27.9743	23.98
	33.2915	19.3959	12.0362	41.7895	17.6082	27.5887	23.1214	56.0043	30.24	39.8235	25.4042	25.53			Levene´s test for homogeneity of variance, from means	p (same):	2.108e-06
	35.7884	19.06	21.62	41.236	28.7066	23.7259	23.2545	36.7112	34.75	35.2798	32.2506	33.64			Levene´s test, from medians	p (same):	0.000292
	37.6031	17.8571	15.1329	41.3454	27.94	18.9944	16.3336	21.2158	22.11	35.5102	27.762	23.52
	29.4851	11.1995	14.7755	33.2464	33.5558	20.6042	25.6167	35.43	49.32	34.8786	23.3831	25.12			Welch F test in the case of unequal variances: F=17,73, df=65,78, p=1,1E-15
	29.6507	19.4652	11.6556	40.1498	18.5396	40.0804	27.658	36.4167	29.3372	38.1818	25.6962	29.94
	30.5418	22.3252	11.254	24.2558	51.6385	21.4488	14.8624	36.4383	34.94	34.2067	25.5486	26.41
	28.87	19.0217	10.8644	31.2438	36.9224	23.8624	12.2593	37.6038	27.5347	26.6417	28.2407	26.95
Mean	30.5264	19.0625	21.6328	36.76	27.9489	30.6733	24.142	36.4207	35.6421	34.3659	27.6805	26.7173
SD	3.07156	3.58635	10.086	5.39748	10.3948	14.0068	8.32376	7.02108	8.75881	4.69535	3.03558	3.27904
	28.9114	18.1521	20.9536	34.9152	26.9164	29.6929	23.2115	34.6913	34.0608	32.6205	26.2308	25.3386
	30.5309	19.0636	21.6284	36.7579	27.9486	30.6711	25.143	36.4154	35.6385	34.3663	27.6774

## Sheet: GSI
GSI	Sep	Oct	Nov	Dec	Jan	Feb	Mar	Apr	May	Jun	July	Aug
	5.0404	1.19691	17.3913	8.93617	14.9466	4.42804	11.6293	10.228	11.48	10.2273	14.9254	12.62			ANOVA
	4.90196	1.26923	10.4247	16.3934	3.67893	3.71287	15.8955	7.39726	12.34	3.84615	18.408	16.82
	8.62712	2.0442	18.0294	7.93951	11.5514	8.7886	9.3574	12.8676	9.17	8.67143	15.0685	16.34				Sum of sqrs	df	Mean square	F	p (same)
	7.40541	1.35294	14.094	18.3432	9.47712	7.48899	1.34868	20.603	14.11	9.08791	15.9794	17.89			Between groups:	4101.48	11	372.862	30.28	2.26e-34
	7.12362	1.83158	14.0162	11.8879	8.22785	10.2857	3.77143	14.0162	13.78	6.38298	17.1717	14.59			Within groups:	2069.03	168	12.3157
	4.38596	1.81818	15.373	10.437	2.77778	3.7037	7.30612	12.069	14.21	5.38462	13.5714	15.22			Total:	6170.51	179
	6.92308	2.28772	10.0116	10.7983	5.38302	10.5844	10.1112	23.1446	13.23	5.91398	16.3775	17.33
	9.88372	1.60241	24.1508	10.6821	7.87402	7.64218	12.037	15.69	15.02	4.82759	13.1579	14.12			omega2:	0.6415
	8.0036	2.13115	10.2484	19.1099	4.5	3.81471	9.15888	10.4	10.24	5.84713	17.4194	17.42
	14.5038	2.65233	13.2442	25.0394	4.31868	10.2657	5.11133	13.3802	13.84	4.06329	19.0183	17.37			Levene´s test for homogeneity of variance, from means	p (same):	1.678e-07
	12.0301	7.15827	13.1802	20.9073	5.29773	1.68539	1.98068	7.12329	11.46	9.38961	18.1818	18.32			Levene´s test, from medians	p (same):	3.337e-06
	3.6	1.90099	20.6871	16.3683	5.17015	7.35294	19.1831	12.773	12.68	6.80851	12.4088	15.75
	5.32558	1.34599	21.1102	15.0064	9.96581	5.61538	9.36556	14.12	11.98	6.10811	19.3103	15.63			Welch F test in the case of unequal variances: F=75,99, df=65,74, p=5,486E-33
	6.77778	2.09091	24.0526	15.8924	8.5042	2.99401	2.42718	14.202	12.83	3.75254	22.2222	17.01
	8.81818	1.39316	24.7207	19.4129	8.97436	10.7797	4.29723	13.58	12.88	7.66667	24.3697	16.19
Mean	7.55669	2.1384	16.7156	15.1436	7.37651	6.60948	8.19871	13.4396	12.6167	6.53185	17.1727	16.1747
sd	2.95091	1.45109	5.19147	4.93497	3.34086	3.10441	5.19431	4.23062	1.57048	2.08057	3.28626	1.55283
			months / Tukey (HSD) / Confidence of 95%:
			Contrast	Difference	Standardized difference	Critical value	Pr > Diff	Signif.
			July vs Oct	13.8272	15.0286	3.16368	< 0,0001	Yes
			July vs Jun	10.6367	13.0263	3.16368	< 0,0001	Yes
			July vs Feb	10.5637	10.1933	3.16368	< 0,0001	Yes
			July vs Jan	9.79222	10.1683	3.16368	< 0,0001	Yes
			July vs Sep	9.61413	11.7092	3.16368	< 0,0001	Yes
			July vs March	8.97397	9.54484	3.16368	< 0,0001	Yes
			July vs Apr	3.74145	2.89195	3.16368	0.107677	No
			July vs Dec	2.02692	2.32528	3.16368	0.372334	No
			July vs Nov	0.454846	0.466213	3.16368	0.999984	No
			Nov vs Oct	13.3724	12.6559	3.16368	< 0,0001	Yes
			Nov vs Jun	10.1818	10.5203	3.16368	< 0,0001	Yes
			Nov vs Feb	10.1089	8.71995	3.16368	< 0,0001	Yes
			Nov vs Jan	9.33737	8.53335	3.16368	< 0,0001	Yes
			Nov vs Sep	9.15929	9.42663	3.16368	< 0,0001	Yes
			Nov vs March	8.51912	7.93075	3.16368	< 0,0001	Yes
			Nov vs Apr	3.28661	2.3574	3.16368	0.351866	No
			Nov vs Dec	1.57208	1.54919	3.16368	0.872122	No
			Dec vs Oct	11.8003	12.2731	3.16368	< 0,0001	Yes
			Dec vs Jun	8.60974	9.97706	3.16368	< 0,0001	Yes
			Dec vs Feb	8.53679	7.95389	3.16368	< 0,0001	Yes
			Dec vs Jan	7.76529	7.74468	3.16368	< 0,0001	Yes
			Dec vs Sep	7.58721	8.74875	3.16368	< 0,0001	Yes
			Dec vs March	6.94704	7.08332	3.16368	< 0,0001	Yes
			Dec vs Apr	1.71453	1.29543	3.16368	0.954959	No
			Apr vs Oct	10.0858	7.43862	3.16368	< 0,0001	Yes
			Apr vs Jun	6.89521	5.35394	3.16368	< 0,0001	Yes
			Apr vs Feb	6.82226	4.74653	3.16368	< 0,0001	Yes
			Apr vs Jan	6.05077	4.3676	3.16368	0.00053112	Yes
			Apr vs Sep	5.87268	4.54983	3.16368	0.00023063	Yes
			Apr vs March	5.23251	3.82044	3.16368	0.00520464	Yes
			March vs Oct	4.85327	4.73957	3.16368	< 0,0001	Yes
			March vs Jun	1.6627	1.78382	3.16368	0.745713	No
			March vs Feb	1.58975	1.40732	3.16368	0.925383	No
			March vs Jan	0.818254	0.769937	3.16368	0.998968	No
			March vs Sep	0.640169	0.683898	3.16368	0.999604	No
			Sep vs Oct	4.21311	4.60027	3.16368	0.000181926	Yes
			Sep vs Jun	1.02253	1.25959	3.16368	0.962325	No
			Sep vs Feb	0.949579	0.919601	3.16368	0.995892	No
			Sep vs Jan	0.178084	0.185701	3.16368	1	No
			Jan vs Oct	4.03502	3.86131	3.16368	0.00444158	Yes
			Jan vs Jun	0.844443	0.884127	3.16368	0.996955	No
			Jan vs Feb	0.771494	0.671628	3.16368	0.999659	No
			Feb vs Oct	3.26353	2.93238	3.16368	0.0967109	No
			Feb vs Jun	0.0729485	0.0708922	3.16368	1	No
			Jun vs Oct	3.19058	3.49926	3.16368	0.0168579	Yes
			Valore critico della d di Tukey:			4.47413
				Mean	Groups
			July	17.1705	A
			Nov	16.7156	A
			Dec	15.1435	A
			Apr	13.429	A
			March	8.1965		B
			Sep	7.55633		B
			Jan	7.37824		B
			Feb	6.60675		B
			Jun	6.5338		B
			Oct	3.34322			C
			months / Fisher (LSD) / Analisi delle differenze tra le modalità con un intervallo di confidenza di 95%:

## Sheet: LNQI
	Sep	Oct	Nov	Dec	Jan	Feb	Mar	Apr	May	Jun	July	Aug
SAFA	453.956	262.51	337.195	226.241	263.586	269.553	234.133	295.309	328.926	322.885	340.132	378.644
	402.068	268.336	360.443	271.671	284.487	281.625	249.497	308.006	340.196	335.017	362.759	397.18
	428.012	265.423	348.819	248.956	274.037	275.589	241.815	301.657	334.561	328.951	351.446	387.912
	428.012	265.423	348.819	248.956	274.037	275.589	241.815	301.657	334.561	328.951	351.446	387.912	Mean
MUFA	190.664	174.993	145.308	131.277	145.248	116.198	104.175	155.413	159.531	139.474	159.749	169.896
	160.77	161.413	139.266	155.242	137.257	118.062	117.831	146.521	160.535	153.97	163.087	178.843
	175.717	168.203	142.287	143.259	141.253	117.13	111.003	150.967	160.033	146.722	161.418	174.369
	175.717	168.203	142.287	143.259	141.253	117.13	111.003	150.967	160.033	146.722	161.418	174.369
PUFA	202.377	164.497	91.4972	328.482	207.166	202.249	207.692	284.277	304.063	286.642	312.118	277.46
	284.061	172.251	74.2911	259.088	194.255	188.315	178.674	280.474	297.269	260.015	286.154	249.977
	243.219	168.374	82.8942	293.785	200.711	195.282	193.183	282.376	300.666	273.328	299.136	263.719
	243.219	168.374	82.8942	293.785	200.711	195.282	193.183	282.376	300.666	273.328	299.136	263.719
∑ ω3	150.468	130.872	65.6711	257.693	173.333	167.23	177.755	237.491	256.475	238.009	250.234	225.719
	221.913	135.377	51.8432	214.512	162.059	155.175	148.391	235.581	250.507	211.367	230.81	205.549
	186.19	133.124	58.7571	236.103	167.696	161.202	163.073	236.536	253.491	224.688	240.522	215.634
	186.19	133.124	58.7571	236.103	167.696	161.202	163.073	236.536	253.491	224.688	240.522	215.634
∑ ω6	49.7701	32.6993	23.7245	65.2014	33.8334	35.0193	29.9375	46.7865	47.5888	48.6324	61.8848	51.7413
	58.9212	35.8641	19.8393	42.8075	32.1959	33.1398	30.2839	44.8927	46.7616	48.6476	55.3435	44.4281
	54.3457	34.2817	21.7819	54.0045	33.0147	34.0796	30.1107	45.8396	47.1752	48.64	58.6142	48.0847
	54.3457	34.2817	21.7819	54.0045	33.0147	34.0796	30.1107	45.8396	47.1752	48.64	58.6142	48.0847
ω3/ω6	3.02325	4.00228	2.76807	3.95226	5.12313	4.77535	5.93753	5.07605	5.38939	4.89405	4.04354	4.36245
	3.76627	3.77472	2.61316	5.01108	5.03353	4.68244	4.89998	5.24765	5.35711	4.34487	4.1705	4.62656
	3.42604	3.88325	2.69752	4.37191	5.07944	4.73017	5.41577	5.16008	5.37339	4.61941	4.10348	4.48446
	3.40519	3.88675	2.69292	4.44508	5.0787	4.72932	5.41776	5.16126	5.37329	4.61944	4.10584	4.49115
ω6/ω3	0.330769	0.249858	0.361263	0.25302	0.195193	0.209409	0.16842	0.197003	0.18555	0.20433	0.247308	0.229229
	0.265515	0.26492	0.382678	0.199558	0.198668	0.213564	0.204082	0.190562	0.186668	0.230157	0.239779	0.216143
	0.291882	0.257516	0.370711	0.228733	0.196872	0.211409	0.184646	0.193796	0.186102	0.216478	0.243696	0.222992
	0.296055	0.257431	0.371551	0.227104	0.196911	0.211461	0.185716	0.193787	0.186107	0.216988	0.243594	0.222788
PUFA/SAFA	0.445806	0.626629	0.271348	1.45191	0.785953	0.750311	0.887069	0.962642	0.924413	0.887751	0.917638	0.732773
	0.706499	0.641921	0.206111	0.953683	0.682825	0.668672	0.716138	0.910613	0.873816	0.776124	0.788826	0.62938
	0.568252	0.634359	0.237643	1.18007	0.732423	0.708598	0.798888	0.93608	0.898688	0.830908	0.851159	0.679842
	0.573519	0.634303	0.238367	1.19522	0.733734	0.709194	0.800698	0.936445	0.898972	0.831594	0.852541	0.680665
UNS/SAT	0.865812	1.29324	0.702279	2.03217	1.337	1.18139	1.33201	1.48892	1.40942	1.31971	1.38731	1.18147
	1.10636	1.24345	0.592486	1.52512	1.1653	1.08789	1.18841	1.38632	1.34571	1.23571	1.2384	1.07966
	0.978794	1.26808	0.645553	1.75551	1.24787	1.13361	1.25793	1.43654	1.37703	1.27694	1.31046	1.12935
	0.983654	1.26826	0.646773	1.77093	1.25006	1.1343	1.25945	1.43726	1.37738	1.27746	1.31205	1.13016
EPA	48.2734	65.3074	29.1145	107.572	66.208	56.772	56.347	74.9626	80.3186	64.5539	75.8208	70.8967
	67.4989	70.1066	23.3633	81.1495	62.3692	53.2249	52.1432	73.7179	77.3234	57.1543	71.5278	66.7312
	57.8862	67.707	26.2389	94.3606	64.2886	54.9985	54.2451	74.3403	78.821	60.8541	73.6743	68.814
	57.8862	67.707	26.2389	94.3606	64.2886	54.9985	54.2451	74.3403	78.821	60.8541	73.6743	68.814
DHA	64.5208	35.0473	20.7711	77.3326	43.2413	50.7462	57.7426	70.0393	90.8536	98.5511	99.7671	95.7052
	98.2524	38.649	18.5352	67.0963	40.7727	41.2947	49.3264	70.8527	93.173	87.5479	96.1864	82.0278
	81.3866	36.8482	19.6531	72.2144	42.007	46.0204	53.5345	70.446	92.0133	93.0495	97.9767	88.8665
	81.3866	36.8482	19.6531	72.2144	42.007	46.0204	53.5345	70.446	92.0133	93.0495	97.9767	88.8665
DHA/EPA	1.33657	0.536652	0.713428	0.718894	0.653113	0.893859	1.02477	0.934324	1.13116	1.52665	1.31583	1.34992
	1.45562	0.551288	0.793347	0.826823	0.653731	0.775851	0.945979	0.961132	1.20498	1.53178	1.34474	1.22923
	1.40598	0.54423	0.749008	0.765303	0.653413	0.836758	0.9869	0.947616	1.16737	1.52906	1.32986	1.2914
	1.39939	0.544057	0.751928	0.77034	0.653419	0.83549	0.985882	0.94769	1.16784	1.52916	1.33014	1.29018
DHA+EPA	112.794	100.355	49.8855	184.904	109.449	107.518	114.09	145.002	171.172	163.105	175.588	166.602
	165.751	108.756	41.8986	148.246	103.142	94.5196	101.47	144.571	170.496	144.702	167.714	148.759
	139.273	104.555	45.892	166.575	106.296	101.019	107.78	144.786	170.834	153.904	171.651	157.68
	139.273	104.555	45.892	166.575	106.296	101.019	107.78	144.786	170.834	153.904	171.651	157.68

## Sheet: Foglio1
Mean Values
	T°	O	S
Sept	22.3331	106.3	38.5
Oct	19.5452	107	38.9
Nov	15.094	99.1	39.1
Dec	14.5972	100.9	38.8
Jan	12.34	98.8	39.1
Feb	15.2	99.4	39.1
Mar	15.928	103.3	39
Apr	17.6321	100.7	38.2
May	21.3791	98	38.5
Jun	23.9102	97.4	38.8
July	26.6636	92.7	38.7
Aug	25.4499	104	38.7

## Sheet: PCA Matrix
	SAFA	MUFA	PUFA	∑ ω3	∑ ω6	ω3/ω6	ω6/ω3	PUFA/SAFA	UNS/SAT	EPA	DHA	DHA/EPA	DHA+EPA	AI	TI	HH
Sep	428.012	175.717	243.219	186.19	54.3457	3.40519	0.296055	0.573519	0.983654	57.8862	81.3866	1.39939	139.273	0.8	0.6	1.07
Oct	265.423	168.203	168.374	133.124	34.2817	3.88675	0.257431	0.634303	1.26826	67.707	36.8482	0.544057	104.555	1.2	0.49	0.83
Nov	348.819	142.287	82.8942	58.7571	21.7819	2.69292	0.371551	0.238367	0.646773	26.2389	19.6531	0.751928	45.892	2.41	1.26	0.38
Dec	248.956	143.259	293.785	236.103	54.0045	4.44508	0.227104	1.19522	1.77093	94.3606	72.2144	0.77034	166.575	0.58	0.29	1.51
Jan	274.037	141.253	200.711	167.696	33.0147	5.0787	0.196911	0.733734	1.25006	64.2886	42.007	0.653419	106.296	1.12	0.44	0.87
Feb	275.589	117.13	195.282	161.202	34.0796	4.72932	0.211461	0.709194	1.1343	54.9985	46.0204	0.83549	101.019	1.16	0.46	0.91
Mar	241.815	111.003	193.183	163.073	30.1107	5.41776	0.185716	0.800698	1.25945	54.2451	53.5345	0.985882	107.78	0.95	0.41	1.01
Apr	301.657	150.967	282.376	236.536	45.8396	5.16126	0.193787	0.936445	1.43726	74.3403	70.446	0.94769	144.786	0.84	0.35	1.11
May	334.561	160.033	300.666	253.491	47.1752	5.37329	0.186107	0.898972	1.37738	78.821	92.0133	1.16784	170.834	0.95	0.36	1.14
Jun	328.951	146.722	273.328	224.688	48.64	4.61944	0.216988	0.831594	1.27746	60.8541	93.0495	1.52916	153.904	1.06	0.4	1.07
July	351.446	161.418	299.136	240.522	58.6142	4.10584	0.243594	0.852541	1.31205	73.6743	97.9767	1.33014	171.651	0.74	0.39	1.23
Aug	387.912	174.369	263.719	215.634	48.0847	4.49115	0.222788	0.680665	1.13016	68.814	88.8665	1.29018	157.68	0.92	0.47	1.07
									Eigenvalue	% Total	Cumulative	Cumulative				Eigenvalue	% Total	Cumulative	Cumulative
								1	7.71486	59.3451	7.71486	59.3451			1	10.2472	64.045	10.2472	64.045
								2	3.57739	27.5183	11.2922	86.8634			2	3.69481	23.0926	13.942	87.1376
								3	1.10095	8.46883	12.3932	95.3323			3	1.1276	7.04751	15.0696	94.1851
								4	0.450961	3.46893	12.8442	98.8012			4	0.516071	3.22544	15.5857	97.4106
								5	0.0836605	0.643542	12.9278	99.4447			5	0.249061	1.55663	15.8348	98.9672
																Factor	Factor	Factor	Factor	Factor
															SAFA	-0.0512889	-0.964229	0.148396	-0.116709	-0.0216644
															MUFA	0.212535	-0.754652	-0.406364	-0.457153	0.0190067
															PUFA	0.96714	-0.20933	0.0398668	0.0182554	0.107985
															n3	0.972121	-0.136846	0.0941251	-0.018592	0.140766
															n6	0.823949	-0.513025	-0.155722	0.142419	-0.0616234
															n3/n6	0.623771	0.58292	0.441319	-0.245655	0.0832434
															n6/n3	-0.725165	-0.5261	-0.359928	0.255334	0.0203542
															PUFA/SAFA	0.903016	0.351394	-0.12506	0.178176	0.103906
															UNS/SAT	0.845462	0.423691	-0.287646	0.0780866	0.0900771
															EPA	0.903662	0.136586	-0.379653	-0.103939	0.0656074
															DHA	0.822999	-0.507706	0.217669	0.0535189	0.0767482
															DHA/EPA	0.434891	-0.703862	0.513119	0.172382	-0.0269099
															DHA+EPA	0.951868	-0.28545	-0.0172221	-0.00883988	0.0806517
															AI	-0.931717	-0.039486	0.0409058	0.0193133	0.350407
															TI	-0.910895	-0.308825	-0.0570387	0.132784	0.19629
															HH	0.952888	0.00273703	-0.151752	0.218281	-0.089247
															Expl.Var	10.2472	3.69481	1.1276	0.516071	0.249061
															Prp.Totl	0.64045	0.230926	0.0704751	0.0322544	0.0155663

## Sheet: STAT
		SAFA							MUFA											PUFA									∑ ω3								∑ ω6							ω3/ω6

## Sheet: Foglio4
DHA/EPA									DHA+EPA
